# **A vital dye method in nematodes reveals age is a critical parameter in density-dependent plasticity**

Michael S. Werner<sup>1,2</sup>, Marc H. Claßen<sup>1,2</sup>, Tess Renahan<sup>1,2</sup>, Mohannad Dardiry<sup>1</sup>, and Ralf. J. Sommer<sup>1\*</sup>

<sup>1</sup>Department of Evolutionary Biology, Max Planck Institute for Developmental Biology, 72076 Tübingen, Germany

<sup>2</sup>These authors contributed equally

\*Corresponding author: [ralf.sommer@tuebingen.mpg.de](mailto:ralf.sommer@tuebingen.mpg.de)

*Werner, et al. A vital dye method in nematodes reveals age is a critical parameter in density-dependent plasticity*

---

**Abstract**

Population size is a major ecological constraint on resources, which affects density-dependent selection over evolutionary time scales. Yet many species can also respond dynamically through phenotypic plasticity. In *Caenorhabditis elegans* and other nematodes, high population density drives juveniles into a dormant dauer stage. In *Pristionchus pacificus* high population density also induces the development of a predatory mouth form. However, it is unknown if such phenotypic switches respond simply to density, or to the density of specific age classes, as in density-dependent selection. Although nematodes have many experimental advantages, their small size has made investigating these and other experimental ecology questions challenging. In particular, no *in vivo* methodologies are currently available to label distinct populations without the need for transgenics. To study potential cross-generational signaling we developed a novel dye-based method to differentiate nematode populations on the same plate, allowing us to track adults with juveniles, or juveniles with juveniles. Surprisingly, only adult crowding induces the predatory morph, even though adult mouth-forms are no longer plastic. We then profiled secreted metabolites through development and traced this result to adult-specific pheromones. Thus, a novel dye-based method reveals age as a critical parameter controlling density-dependent plasticity.

**Keywords:** Phenotypic plasticity, population density, *Pristionchus pacificus*, *Caenorhabditis elegans*, nematode derived modular metabolites (NDMMs)

## 1. Introduction

Population density is an important ecological parameter, with higher densities corresponding to increased competition for resources [1]. In addition to density-dependent selection [2,3], which operates on evolutionary time scales, some organisms can respond dynamically to population density through phenotypic plasticity. For example, plants can sense crowding by detecting the ratio of red (chlorophyll absorbing) to far red (non-absorbing) light, and respond by producing higher shoots [4]. Locusts undergo solitary to swarm (i.e. gregarious) transition, and aphids can develop wings, both as results of increased physical contact [5-7]. Intriguingly, population density can also have cross-generational effects. For example, adult crowding of the desert locust *Schistocerca gregaria* [8,9] and migratory locust *Locusta migratoria* [10,11] also influences the egg size, number, and morphology of their progeny; and high population densities of red squirrels elicit hormonal regulation in mothers to influence faster developing offspring [12]. In many species population density and cross-generational signaling are detected through pheromones, however the precise nature, mechanisms of induction, age-specificity and exact ecological role are not well understood.

Nematodes are a powerful model system to investigate the mechanisms of density-dependent plasticity because many small molecule pheromones that affect plastic phenotypes have been characterized [13-15]. For example, in the model organism *Caenorhabditis elegans*, high population densities induce entry into a stress resistant dormant 'dauer' stage [16]. The decision to enter dauer was revealed to be regulated by a family of small molecule nematode-derived modular metabolites (NDMMs) called ascarosides that act as pheromones[14,17,18]. Ascarosides consist of an ascarylose sugar with a fatty acid side chain and modular head and terminus groups (figure 1a). The level and composition of ascarosides was later shown to be dependent on sex [19,20] and developmental stage [21], although it is thought that dauer can be induced by all developmental stages [22]. Subsequent studies revealed that specific NDMMs

Werner, et al. A vital dye method in nematodes reveals age is a critical parameter in density-dependent plasticity

---

also regulate other life history traits, such as mating [19,20], social behavior [23] and developmental speed [24]. Although NDMMs are broadly conserved [25-27], inter- and intraspecific competition has driven the evolution of distinct response regimes in different strains and species for the same phenotypes [25,28-31]. Additionally, more complex structures have been observed that affect distinct plastic phenotypes [32].

In *Pristionchus pacificus*, a soil-associated nematode that is reliably found on scarab beetles (figure 1a)[33-35], an ascaroside dimer (dasc#1) that is not found in *C. elegans* regulates the development of a predatory mouth form [32,36,37]. Mouth-form plasticity represents an example of a morphological novelty that results in predatory behavior to exploit additional resources and kill competitors. Specifically, adult *P. pacificus* exhibit either a narrow stenostomatous (St) mouth, which is restricted to bacterial feeding (figure 1b), or a wide eurystomatous (Eu) mouth with an extra denticle (figure 1c), which allows for feeding on bacteria and fungi [38], and predation on other nematodes [39]. This type of phenotypic plasticity is distinct from direct vs. indirect (dauer) development because it results in two alternative life history strategies in the adult (for review see Sommer & Mayer, 2015 [40]). Recent studies in *P. pacificus* have begun to investigate the dynamics and succession of nematodes on decomposing beetle carcasses to better understand the ecological significance of mouth-form plasticity [41]. These studies revealed that on a carcass (figure 1d), *P. pacificus* exits the dauer diapause to feed on microbes, and then re-enters dauer after food sources have been exhausted, displaying a 'boom-and-bust' ecology [33,41]. Presumably different stages of this succession comprise different ratios of juveniles and adults, and recognizing the age-structure of a population as a juvenile could provide predictive value for adulthood. In locusts density-dependent plasticity is affected by the age of crowded individuals [5], however age has not yet been demonstrated to have a role in density-dependent plasticity in nematodes. Apropos, whether the mouth-form decision is sensitive to population age structure has never

been investigated, neither experimentally, nor chemically by performing NDMM profiles of multiple developmental stages.

While nematodes have many experimental advantages, including easy laboratory culture and advanced genetic, genomic and the aforementioned chemical tools, their small size has made investigations at the organismal level and in experimental ecology challenging. For example, no *in vivo* methodologies are currently available to label distinct populations without the need for transgenics, which is only available in selected model organisms such as *C. elegans*, *P. pacificus* and some of their relatives. Here, we combine a novel dye-staining method with the first developmental pheromone profiling in *P. pacificus* to study potential affects of age on density-dependent plasticity. This vital-dye method allows tracking adults with juveniles, or juveniles with juveniles, and can be applied to any nematode system that can be cultured under laboratory conditions. In contrast to dauer, we found that mouth form is strongly affected by cross-generational signalling. Specifically, only adult crowding induces the predatory morph, which is controlled by adult-specific pheromones.

## 2. Materials and methods

### (a) Nematode strains and husbandry

*P. pacificus* Wild-type RS2333 (California) and RSC017 (La Réunion) strains were kept on 6 cm nematode growth media (NGM) plates seeded with OP50 and kept at 20°C. RSC017 is highly St and does not predate on other nematodes, and thus was used for biological assays instead of the highly Eu, predatory RS2333.

### (b1) Pheromone profiling

*Werner, et al. A vital dye method in nematodes reveals age is a critical parameter in density-dependent plasticity*

---

**HPLC-MS sample preparation for normal exo-metabolome and time resolved analysis**

To collect staged pheromone profiles, we seeded 35 x 6 cm plates with 5 worms each, and bleached 5-6 days later when gravid to collect eggs/J1s. These were then seeded in 6 x 10 mL flasks with OP50 as described in Werner et al., 2017 [42]. Then at 24, 48, or 72 hr time intervals, supernatant was obtained by centrifugation (>4,000 x g, 4°C for 10 minutes). 1 mL supernatant was adsorbed onto a SPE-C8 cartridge (Thermo Scientific Hypersept C8 100 mg/1mL), conditioned with 1 mL MeOH followed by 2 mL Millipore water. The adsorbed material was then washed with 200 uL water and subsequently eluted with 200 uL MeOH. This extract was then measured directly via HPLC-qTof MS (Bruker ImpactII).

**(b2) HPLC-MS measurement**

20 uL extract was injected into a Thermo ultimate 3000 HPLC equipped with a Sigma-Aldrich Ascentis Express C18 2.7um 10mm x 4.6mm column at 20 °C with a flow of 500 uL/min. All MS measurements have been performed in negative ion mode and molecules are detected as [M-H]<sup>-</sup> ions. The solvent gradient started with 5 % acetonitrile (ACN)/ 95 % water (both containing 0.1 % formic acid) for 2 min. After this equilibration step, the ACN proportion has been increased to 65 % over 8 min, then to 100 % ACN in 1.2 min followed by a hold step for 8.8 min. Afterwards, the system was flushed to 5 % ACN with 2 min equilibration for a total of 22 min. For calibration, a sodium formate cluster building solution has been automatically injected in the first 2 minutes of each run. Data analysis was performed with TASQ version 1.0 from Bruker Daltonics. Extracted ion chromatograms for each well-known compound with a mass width of 0.1 m/z and time slices of 0.5 min around the expected retention time have been produced after calibrating and baseline correction. Assignment errors have been corrected with the provided MRSQ value.

# **(c) Statistical analysis of NDMMs**

NDMM levels were compared simultaneously between strains and developmental stages by a linear model in R: `lm('NDMM' ~ 'developmental stage' * 'strain', data='data.frame')`). *P* values between stages and strains were adjusted for multiple testing by a false discovery rate correction. The level of fit between linear vs. exponential growth was determined by the Akaike information criterion (AIC). The lowest AIC for iterations of different exponents ( $n=1,2,3,\dots$ ) was used for comparison to the simple linear model. While significant in both cases, for consistency we present the original *p* values from the original linear model in Supplementary Figure 8.

134

# **(d) Supernatant collection and assays**

Strains RS2333, RSC017, and RS2333-*daf-22.1;22.2* were raised in 10 mL liquid culture as in the time-resolved NDMM collections (b1). For each time point, 9 mL of the supernatant was lyophilized overnight, extracted again overnight with 90% ethanol (diluted in Millipore water) while being stirred, and centrifuged (4000g, 10 min, 4°C). The solvent was evaporated and the solid re-dissolved with 1 mL Millipore water. This clear extract was then directly used for the assays. One mL of the supernatant was cleaned for HPLC-MS analysis (refer to pheromone profiling: HPLC-MS sample preparation) for quality control. For the assays, RSC017 was synchronized by bleaching and added to plates seeded with 300  $\mu$ L OP50. The supernatants were added to the RSC017 J2s in two 500  $\mu$ L increments (for a total of 1 mL supernatant) and dried for 30 minutes in a sterile hood after each addition. Plates were kept at 20°C and adult mouth forms were screened three days later.

147

# **(e) Dye Staining**

A stock solution of Neutral Red was prepared by dissolving 0.5 mg in 10 mL 5% acetic acid and stored at -20°C. Working solutions were prepared by 100x dilution in M9, aliquoted, stored at -

*Werner, et al. A vital dye method in nematodes reveals age is a critical parameter in density-dependent plasticity*

---

20°C, and thawed directly before use. Working solutions were kept for approximately 1 month. Stock solutions of 10 mM Green Bodipy were made in DMSO and stored -20. J2s were prepared from 20-40 x 6 cm plates 6 days after passaging 5 worms to each plate on 300 µl OP50. Worms were washed from plates with M9 into a conical tube, and then filtered through 2x20 µM filters (Millipore) placed between rubber gaskets. The flow-through contains mostly J2 and some J3, which were pelleted by centrifugation, 8 seconds on a table-top eppendorf centrifuge 5424, reaching approximately 10,000 x g. The juvenile pellet was then either re-suspended in 1 ml Neutral Red working solution, or in 1 ml M9 and split to two tubes, then re-centrifuged, and then re-suspended in either 1 ml working solution Neutral Red (0.005% in M9) or 1 ml 50 µM Green BODIPY (Thermo) in M9. Tubes were then rotated for 3 hours in the dark, then washed by centrifugation as before, and re-suspended in 1 ml M9. This was repeated 3-4x until the dye was no longer visible in the worm pellet. Then, the concentration of worms was determined by aliquoting 2 µl onto a glass coverslip in 5 technical replicates, and counted under a dissecting microscope. Finally the appropriate number of animals was added to 6 cm plates that had been previously seeded with 300 µl OP50, and incubated at 20°C. After 3 days, 100% of worms exhibited Neutral Red staining ( $n=50$ , Supplementary figure 4). Dauers and J2s recovered after Neutral Red staining developed at the same developmental speed (3-4 days) and with the same mouth-form ratio as control worms recovered side-by-side (100% St for both, Supplementary figure 5,  $n=30$ ). Dauers and J2s stained with Cell tracker Green BODIPY (50 µM) (Thermo) were similar, although less efficiently stained compared to Neutral Red. On day 4, 90% retained intestinal fluorescence (Supplementary figure 4), although brightness decreased with the number of days. Mouth-form ratios of dauers or J2s in +/- 50 µM Cell tracker Green BODIPY also developed at equivalent rates and mouth-form ratios (Supplementary figure 5). Lower than 25 µM did not yield strongly fluorescent worms after three hours. Cell Tracker Blue CMAC (Thermo) was also used at 50 µM and imaged 3 days post-staining for *P. pacificus*, and



*Werner, et al. A vital dye method in nematodes reveals age is a critical parameter in density-dependent plasticity*

---

one day post-staining for *C. elegans*. However, due to the higher fluorescent background in the blue light spectrum in both *P. pacificus* and *C. elegans*, we performed all experiments using only Neutral Red and Cell tracker Green BODIPY.

# **(f) Mixed culture experiments and statistical analysis**

We performed mixed culture experiment presented in figure 2 with 3 to 5 independent biological replicates, and a minimum total number of counts  $n > 100$  (median counts per replicate for J2=29 and the median counts per replicate for dauers=27). J2 or dauers were stained with Neutral Red as described in the 'Dye Staining' method section, then added to green-stained J2, dauer, or adult populations on 6 cm plates with 300  $\mu$ l OP50 and incubated at 20° C. To ensure consistent bacterial food supply, we added 1 ml more overnight OP50-LB to each plate on the following day, then air-dried under a chemical fume hood for 1 hour, then returned to 20° C. On days 3-4, we phenotyped 'red' adults that exhibited no 'green' staining. To assess whether the age of the 'green' surrounding population affects the mouth form of the dependent variable 'red' J2s we performed a binomial regression on Eu counts (i.e. "successes") weighted by the number of counts per replicate and the number added as a fixed effect, using a generalized linear model from the standard statistical package in R:

```
glm(formula=cbind(Eu,total)~'stage_added' * '#_added', data='J2/Da', family="binomial")
```

See Supplementary figure 6a for a table containing the resulting  $p$  values. The AIC for our models (78.97 for J2s and 89.59 for dauers) was substantially lower than the null hypothesis (220.16 for J2s and 147.29 for dauers), arguing a reasonable fit. For pair-wise comparisons of the effect of age for a given number of added animals, we performed a post-hoc Fisher's exact test on a contingency table containing the summed counts of Eu and St observations. For display, we converted Eu counts into percent of total in figure 2, with the  $p$  values between the

*Werner, et al. A vital dye method in nematodes reveals age is a critical parameter in density-dependent plasticity*

---

200 same number of animals added indicated over the adult-added population (Significance codes:  
201 0 '\*\*\*\*' 0.001, '\*\*' 0.01, '\*' 0.05).

202

203 **(g) Measuring the effect of food depletion on mouth form**

204 To verify that starvation was not a factor in our mixed culture experiments, we added increasing  
205 number of J2s to standard 6 cm plates with 300 µl OP50 (see Figure 4) to rapidly consume  
206 bacterial food, and measured both the amount of animals that reached adulthood, and the  
207 percent Eu in each population for two biological replicates. To assess the affects of added J2s  
208 to each dependent variable we performed a binomial regression with count data weighted by the  
209 total number of counts for each replicate:

210 `glm(formula = cbind(reached_adult, total)~thousand_J2s, data=data_2, family="binomial")`

211 *p* values indicate a significant difference in percent reaching adult as a function of J2s added,  
212 but not in percent Eu (Supplementary Fig. 6b).

213

214 **(h) Microscopy**

215 All images were taken on a Zeiss Axio Imager 2 with an Axiocam 506 mono, and processed  
216 using Zen2 pro software. Image brightness and contrast were enhanced in ImageJ with a  
217 minimum displayed value of 10 and maximum of 100 for all images in Fig 2, and Supplementary  
218 figures 4 and 5, and a minimum of 21 and maximum of 117 for Supplementary figure 3. The  
219 following exposure times were used for all images: Cy3 (peak emission = 561, exposure = 80  
220 ms), FITC (peak emission = 519, exposure = 150 ms), Dapi (peak emission = 465, exposure =  
221 80 ms), DIC (exposure = 80-140 ms).

222

223 **(i) Dauer induction**

To induce dauer, mixed-stage plates with little to no OP50 were washed with M9 and the resulting worm pellets were used in a modified 'White Trap' method. Worm pellets were placed on killed *Tenebrio molitor* grubs and dispersing dauers were collected in surrounding MilliQ water. Age of dauers ranged from one week to one month.

### 3. Results

#### (a) A vital dye method for labeling nematode populations

To directly test if different age groups of nematodes influence plastic phenotypes, we required two synchronized populations to co-habit the same space, yet still be able to identify worms from different age groups. To do so, we developed a dye-staining methodology to robustly differentiate between nematode populations. After trying several vital dyes, we identified that Neutral Red [43] and CellTracker Green BODIPY (Thermo) stain nematode intestines brightly and specifically to their respective channels (figure 2a-e, Supplementary Fig. 1, Materials and methods). These dyes stain all nematodes tested including *C. elegans* (Supplementary figure 2) and dauer larvae (Supplementary figure 3). They last more than three days (Supplementary figure 4), allowing long-term tracking of mixed nematode populations. Importantly, neither Neutral Red nor CellTracker Green staining affect viability, developmental rate, or the formation of specific morphological structures, such as *P. pacificus* mouth form (Supplementary figure 5). Thus, Neutral Red and CellTracker Green allow specific labeling of worm populations to study age-dependent effects on phenotypes.

#### (b) Adult but not juvenile crowding induces the predatory mouth form in *P. pacificus*

To assess potential intra-, or inter-generational influence on *P. pacificus* mouth form we stained juveniles of the highly St strain RSC017 with Neutral Red, and added an increasing number of

*Werner, et al. A vital dye method in nematodes reveals age is a critical parameter in density-dependent plasticity*

---

249 CellTracker Green-stained RSC017 adults or juveniles (figure 2f,g). Three days later we  
 250 phenotyped red animals that had developed into adults, but showed no green staining. To  
 251 ascertain potential differences between adding juveniles or adults, we performed a binomial  
 252 regression on Eu count data from multiple independent biological replicates ( $n > 3$ ), with age and  
 253 number of individuals added as fixed effects (Materials and methods, Supplementary figure 6).  
 254 We observed a significant increase in Eu worms in response to adults, but not juveniles ( $p = 2.59$   
 255  $\times 10^{-2}$ ; for display summed percents are shown in figure 2h,i). Almost half (48%) of the  
 256 population developed the Eu mouth form with just 500 adult animals, which is a greater than 50-  
 257 fold induction compared to side-by-side controls (figure 2h,i). We were also curious if dauers,  
 258 which have a thickened cuticle and represent a distinct stage in the boom-and-bust life cycle of  
 259 nematodes, could still respond to adults. Indeed, the same trend that was observed with  
 260 juveniles was seen with dauers ( $p = 2.96 \times 10^{-3}$ ), albeit to a more muted extent (figure 2j,k).  
 261 Specifically, with a total of 200 dauers and 500 adults, 25.7% of dauers become Eu, whereas  
 262 only 1.8% of dauers become Eu on a plate containing 700 dauers (and no adults) (figure 2j).  
 263 Collectively, these data indicate that adult crowding specifically induces the Eu mouth form.

264 Even though we did not detect a mouth-form switch in large populations of J2s or  
 265 dauers, and food was still visible on plates containing the most animals (500 adults and 200  
 266 juveniles), we could not completely rule out the possible effect of food availability on mouth  
 267 form. As a proxy for starvation, we conducted assays with greatly increased numbers of  
 268 juveniles from 1,000 to 10,000 that would rapidly deplete bacterial food. We noticed a stark cliff  
 269 in the fraction of juveniles that reach adulthood at 4,000-5,000 animals, arguing that food is a  
 270 limiting resource at this population density (figure 2l). Importantly however, in these plates we  
 271 still did not see a shift in mouth form ( $p = 0.99$ , binomial regression, Supplementary figure 6).  
 272 With an overwhelming 10,000 worms on a plate, 5.8% were Eu, compared to 48% in the

presence of only 500 adults. While longer-term starvation may yet have an impact on mouth form, under our experimental conditions it appears to be negligible.

### **(c) Adult but not juvenile secretions induce the Eu mouth form**

As mouth-form plasticity in *P. pacificus* is regulated by nematode-derived modular metabolites (NDMMs)[32], we wondered if the difference between adults and juveniles resulted from differences in secreted NDMMs. To test this hypothesis we added secretions from adult or juvenile worms to RSC017 (highly St) juveniles. We found that adult secretions from both the laboratory strain RS2333 (highly Eu) and RSC017 led to a significant increase in the Eu morph relative to juvenile secretions ( $p=5.27 \times 10^{-6}$ ,  $1.33 \times 10^{-3}$ , respectively, Fisher's exact test)(figure 3). To confirm the effect was caused by ascaroside pheromones, we exposed RSC017 juveniles to supernatant from a *daf-22.1;22.2* double mutant, which exhibits virtually no ascaroside production in both *C. elegans* and *P. pacificus* [26,44]. Again, juvenile secretion had no impact on Eu frequency, but in contrast to wild-type supernatants, we also observed no increase in Eu frequency with adult secretions ( $p=0.8324$ , Fisher's exact test, figure 3). Thus, adult-specific NDMMs induce development of the Eu mouth form.

### **(d) Developmental-staged NDMM profiles reveal adult-specific synthesis of dasc#1**

Next, we investigated whether the difference between adult and juvenile pheromones is one of dosage, or of identity. To answer this question and verify age-specific differences in pheromones, we profiled *P. pacificus* NDMM levels in two strains and at three time points through development. We used RS2333 and RSC017 and measured the exo-metabolomes of juvenile stage 2 (J2s, 24 hrs), J3s (48 hrs) and J4/adults (72 hrs) from a constant culture with excess OP50 bacterial food (figure 4a,b, Supplementary figure 7, Materials and methods). To assess potential differences in pheromone levels we performed a linear regression with the area

*Werner, et al. A vital dye method in nematodes reveals age is a critical parameter in density-dependent plasticity*

under the curve for each NDMM (aoc) (Supplementary Figure 1a) as the response variable. Stage and strain were modeled as fixed effects, and because we performed separate regression analyses for each pheromone, we adjusted the resulting  $p$  values for multiple testing using false discovery rate (FDR)(see Supplementary figure 8 for  $p$  and  $FDR$  values between stage and strain). We observed that there was a significant affect of developmental stage on the levels of ascr#9, ascr#12, npar#1, and dasc#1, and that ubas#1 and #2 are strain and stage specific ( $FDR < 0.05$ ). Interestingly, dasc#1 is the most potent known Eu-inducing compound when tested as a single synthesized compound, while npar#1 is both Eu- and dauer-inducing (figure 4c,d,f-i)[32]. Closer inspection revealed dasc#1, npar#1, and ascr#9 increase throughout development in both strains, and dasc#1 peaks in adults in RS2333 ( $p < 0.05$ , student's two-tailed  $t$ -test between 72 hrs and 24 hrs for each NDMM in both strains, and also 72 hrs and 48 hrs for dasc#1 in RS233). Intriguingly, the trajectory of dasc#1 appeared binary in both strains (figure 4f,g). In fact our statistical model for dasc#1 fits better if we assume cubic rather than linear growth ( $\Delta AIC = 3.958$ ). In contrast, ascr#9, which was also statistically up-regulated but does not affect known plastic phenotypes [32], displays a more gradual increase in both strains (figure 4e,j,k), and the model fits better with linear growth ( $AIC_{linear} - AIC_{cubic} = -1.208$ ). Meanwhile, the trajectory of npar#1 appears strain specific (figure 4h,i). Hence the mode of induction is NDMM-specific, and the kinetics of production may be related to their roles in phenotypic plasticity.

In principle, the increase in abundance of certain pheromones could be a result of a concomitant increase in body mass, however several observations indicate more targeted regulation. First, no other compounds were significantly different in our linear model. Second, an analysis of previously published RNA-seq data [45] reveals the increase in NDMM abundance corresponds to an increase in transcription of the thiolase *Ppa-daf-22.1* (Supplementary figure 9) the most downstream enzyme in the  $\beta$ -oxidation pathway of ascaroside synthesis. Third,

*Werner, et al. A vital dye method in nematodes reveals age is a critical parameter in density-dependent plasticity*

---

pasc#9 and pasc#12 actually exhibit a peak in abundance at the 48 hr/J3 time point, rather than in 72 hrs/adults. Finally, we profiled the endo-metabolome of eggs, and found appreciable amounts of ascr#1, #9, #12, and pasc#9, but little to no traces of other ascaroside derivatives (Supplementary figure 7), suggesting age-specific synthesis rather than release. Together, these results suggest that the observed increase in ubas#1 and #2, ascr#9, npar#1, and dasc#1 over time corresponds to age-specific production. The observation that dasc#1 is produced specifically during the juvenile-to-adult transition is especially intriguing because adults are no longer able to switch mouth forms, hinting at cross-generational signaling.

#### 4. Discussion

Here, we introduce a novel dye-based method that allowed us to determine cross-generational influence on mouth form, and demonstrate this effect is a result of age-specific production of plasticity affecting pheromones. In doing so, we provide the first multi-stage time series of pheromone production in *P. pacificus*, which shows that dasc#1 exhibits a surprising 'off-on' switch-like induction pattern. Collectively, our results argue that adults represent a critical age group [46] in nematode populations.

Our developmental profiling revealed an increase in two NDMMs that affect plastic phenotypes. The observation that this trend mirrors the transcriptional regulation of enzymes involved in NDMM synthesis argues that the stage-dependent increase is not simply a result of an increase in body mass, but rather that these molecules are programmed for stage-specific induction. The binary 'off-on' kinetics might reflect a population level feed-back loop, such that the production of density-sensing pheromones is based on a threshold level of previously produced pheromones. It is also worth noting that while npar#1 is the major dauer-inducing pheromone in *P. pacificus* [32], we did not observe dauers in any experimental setup described herein. Thus, it seems that mouth-form phenotype is the first-level plastic response to

Werner, et al. A vital dye method in nematodes reveals age is a critical parameter in density-dependent plasticity

---

population density. Presumably higher concentrations are required for dauer induction, reflecting a calculated response strategy depending on the level of crowding or duration of starvation. Interestingly, the effect of adult supernatants was noticeably less (23%-26% Eu) than with adult worms (up to 48% with only 500 adults). It is difficult to compare the amount of pheromone concentrations between experiments, but presumably worms in the vital-dye assay experienced a greater local concentration as they were in direct physical contact with each other, compared to worms in the supernatant assay.

Among the many environmental influences on mouth form [42], population density and starvation are perhaps the most ecologically relevant. However, teasing apart these two factors has proven difficult [47]. Here, we demonstrate that while a strong shift is observed with adult-specific pheromones, no such effect was seen under limited resource conditions. Thus, age-specific crowding is sufficient to induce the Eu mouth form. Nevertheless, this does not preclude that long term starvation could also have an effect. Determining the relative contributions of these factors to mouth form will be important to better understand the sophisticated ecological response strategies of *P. pacificus*, nematodes, and phenotypic plasticity in general.

Why do adults and not juveniles affect mouth form? Given that St animals can develop faster [48], there may be a 'race' to sexual maturation in emergent populations at low densities. But as the nematode population increases, there will likely be a commensurate decrease in bacterial populations. When faced with competition from other nematodes, *P. pacificus* has a particular advantage in developing the Eu morph; their expanded dietary range includes their competition. Indeed, when nematode prey is the only available food source, the Eu morph provides longer life spans and more progeny than the St morph [49]. When resources become depleted as population size increases, *C. elegans* and other monomorphic nematodes may enter dauer and disperse [50]. But in St-biased dimorphic strains of *P. pacificus*, juveniles may switch to the Eu morph in response to adults as a first level indication of rapidly increasing



Werner, et al. A vital dye method in nematodes reveals age is a critical parameter in density-dependent plasticity

---

population size (Supplementary figure 10). Then, after prolonged starvation and crowding, worms will presumably enter dauer. By analogy to economic models of population growth [51,52] we view mouth-form plasticity and dauer formation as alternative ‘technological innovations’ to escape a Malthusian resource trap. To what extent this occurs in nature, or with *P. pacificus* strains that are highly Eu, remains to be determined.

The evolution of dimorphic mouth forms is one among myriad nematode ecological strategies. For example, entomopathogenic nematodes release their symbiont bacteria in insect hosts to establish their preferred food source, and some release antibiotics to kill off competing bacteria and fungi from other entomopathogenic species [53]. Some free-living species, like those of the genus *Oscheius*, refrain from combat and stealthily feed and reproduce amidst warring entomopathogenic species. Interspecific killing also occurs in gonorchoristic species, in which both mated and virgin males are killed, implying fighting not just for mates but for resources as well [54,55]. Reproductive strategies also exist, and hermaphroditic species have an advantage over gonachristic species when colonizing a new niche, such as an insect carcass [56]. Meanwhile insect hosts and colonizing nematodes have their own distinct pheromone-based attraction and toxicity [57,58]. Finally, the renaissance of *C. elegans* sampling from around the world [59-63] is rapidly building a resource of wild isolates that will almost certainly have different and fascinating ecologies. We hope our method for labeling and then combining different nematode populations on the same plate will aid in studies to identify these strategies. Perhaps the time is also ripe to complement these studies with more sophisticated ecological modelling that can lead to more testable hypotheses.

Although beyond the scope of this manuscript, the cross-generational communication we observed could in principle reflect an intended signal from adults to juveniles, i.e. kin selection [64]. However, we favor a more simplistic view that juveniles have evolved to recognize adult-produced metabolites. Regardless of these interpretations, our results argue that age groups

*Werner, et al. A vital dye method in nematodes reveals age is a critical parameter in density-dependent plasticity*

---

are a critical factor in density-dependent plasticity, as has been theorized in density-dependent selection [65].

# **Author Contributions**

MSW and RJS conceived of the project. MC conducted pheromone profiling. MSW and TR designed and conducted dye-labeling experiments. TR and MC performed supernatant experiments. MD and MSW considered ecological implications. MSW and TR wrote the manuscript with input and edits from all authors.

# **Acknowledgements**

We would like to thank all members of the Sommer lab, Dr. Talia Karasov, Dr. Hernan Burbano and Moises Exposito-Alonso for guidance with statistical analysis, and Dr. Adrian Striet (Max Planck Institute), and Dr. Cameron Weadick (University of Sussex) for thoughtful critique and discussion.

# **References**

- Hastings, A. 2013 *Population biology: concepts and models*.
- MacArthur, R. H. 1962 Some generalized theorems of natural selection. *Proc Natl Acad Sci USA* **48**, 1893–1897. (doi:10.1073/pnas.48.11.1893)
- Travis, J., Leips, J. & Rodd, F. H. 2013 Evolution in Population Parameters: Density-Dependent Selection or Density-Dependent Fitness? *The American Naturalist* **181**, S9–S20. (doi:10.1086/669970)
- Dudley, S. A. & Schmitt, J. 2015 Testing the Adaptive Plasticity Hypothesis: Density-Dependent Selection on Manipulated Stem Length in *Impatiens capensis*. *The American Naturalist* **147**, 445–465. (doi:10.1086/285860)

Werner, et al. A vital dye method in nematodes reveals age is a critical parameter in density-dependent plasticity

- 425 5. Pener, M. P. & Simpson, S. J. 2009 Locust Phase Polyphenism: An Update.  
426 *Advances in insect physiology*. (doi:10.1016/S0065-2806(08)36001-9)
- 427 6. Simpson, S. J., Despland, E., Hägele, B. F. & Dodgson, T. 2001 Gregarious behavior  
428 in desert locusts is evoked by touching their back legs. *Proc Natl Acad Sci USA* **98**,  
429 3895–3897. (doi:10.1073/pnas.071527998)
- 430 7. Slogget, J. J. & Weisser, W. W. 2004 *Aphids in a New Millennium*. INRA
- 431 .
- 432 8. Simpson, S. J. & Miller, G. A. 2007 Maternal effects on phase characteristics in the  
433 desert locust, *Schistocerca gregaria*: A review of current understanding. *Journal of*  
434 *Insect Physiology* **53**, 869–876. (doi:10.1016/j.jinsphys.2007.05.011)
- 435 9. Maeno, K. & Tanaka, S. 2008 Maternal effects on progeny size, number and body  
436 color in the desert locust, *Schistocerca gregaria*: Density- and reproductive cycle-  
437 dependent variation. *Journal of Insect Physiology* **54**, 1072–1080.  
438 (doi:10.1016/j.jinsphys.2008.04.010)
- 439 10. Chen, B., Li, S., Ren, Q., Tong, X., Zhang, X. & Le Kang 2015 Paternal epigenetic  
440 effects of population density on locust phase-related characteristics associated with  
441 heat-shock protein expression. *Molecular Ecology* **24**, 851–862.  
442 (doi:10.1111/mec.13072)
- 443 11. Hamouda, A. B., and, S. T. O. E. 2011. Density-dependent phenotypic plasticity in  
444 body coloration and morphometry and its transgenerational changes in the migratory  
445 locust, *Locusta migratoria*. *Journal of Entomology and Nematology*.
- 446 12. Ben Dantzer, Newman, A. E. M., Boonstra, R., Palme, R., Boutin, S., Humphries, M.  
447 M. & McAdam, A. G. 2013 Density Triggers Maternal Hormones That Increase  
448 Adaptive Offspring Growth in a Wild Mammal. *Science* **340**, 1235765–1217.  
449 (doi:10.1126/science.1235765)
- 450 13. Butcher, R. A. 2017 Small-molecule pheromones and hormones controlling nematode  
451 development. *Nature Chemical Biology* **13**, 577–586. (doi:10.1038/nchembio.2356)
- 452 14. Butcher, R. A., Fujita, M., Schroeder, F. C. & Clardy, J. 2007 Small-molecule  
453 pheromones that control dauer development in *Caenorhabditis elegans*. *Nature*  
454 *Chemical Biology* **3**, 420–422.
- 455 15. Reuss, von, S. H., Bose, N., Srinivasan, J., Yim, J. J., Judkins, J. C., Sternberg, P. W.  
456 & Schroeder, F. C. 2012 Comparative metabolomics reveals biogenesis of  
457 ascarosides, a modular library of small-molecule signals in *C. elegans*. *J. Am. Chem.*  
458 *Soc.* **134**, 1817–1824. (doi:10.1021/ja210202y)
- 459 16. Fielenbach, N. & Antebi, A. 2008 *C. elegans* dauer formation and the molecular basis  
460 of plasticity. *Genes & Development* **22**, 2149–2165. (doi:10.1101/gad.1701508)
- 461 17. Butcher, R. A., Ragains, J. R., Kim, E. & Clardy, J. 2008 A potent dauer pheromone

Werner, et al. A vital dye method in nematodes reveals age is a critical parameter in density-dependent plasticity

- 462 component in *Caenorhabditis elegans* that acts synergistically with other components.  
463 *Proc Natl Acad Sci USA* **105**, 14288–14292. (doi:10.1073/pnas.0806676105)
- 464 18. Jeong, P.-Y. et al. 2005 Chemical structure and biological activity of the  
465 *Caenorhabditis elegans* dauer-inducing pheromone. *Nature* **433**, 541–545.  
466 (doi:10.1038/nature03201)
- 467 19. Chasnov, J. R., So, W. K., Chan, C. M. & Chow, K. L. 2007 The species, sex, and  
468 stage specificity of a *Caenorhabditis* sex pheromone. *Proc Natl Acad Sci USA* **104**,  
469 6730–6735. (doi:10.1073/pnas.0608050104)
- 470 20. Izrayelit, Y., Srinivasan, J., Campbell, S. L., Jo, Y., Reuss, von, S. H., Genoff, M. C.,  
471 Sternberg, P. W. & Schroeder, F. C. 2012 Targeted metabolomics reveals a male  
472 pheromone and sex-specific ascaroside biosynthesis in *Caenorhabditis elegans*. *ACS*  
473 *Chem. Biol.* **7**, 1321–1325. (doi:10.1021/cb300169c)
- 474 21. Kaplan, F. et al. 2011 Ascaroside Expression in *Caenorhabditis elegans* Is Strongly  
475 Dependent on Diet and Developmental Stage. *PLoS ONE* **6**, e17804.  
476 (doi:10.1371/journal.pone.0017804)
- 477 22. Golden, J. W. & Riddle, D. L. 1982 A pheromone influences larval development in the  
478 nematode *Caenorhabditis elegans*. *Science* **218**, 578–580.  
479 (doi:10.1126/science.6896933)
- 480 23. Srinivasan, J. et al. 2012 A Modular Library of Small Molecule Signals Regulates  
481 Social Behaviors in *Caenorhabditis elegans*. *PLOS Biol* **10**, e1001237.  
482 (doi:10.1371/journal.pbio.1001237)
- 483 24. Ludewig, A. H. et al. 2017 Larval crowding accelerates *C. elegans* development and  
484 reduces lifespan. *PLoS Genet* **13**, e1006717. (doi:10.1371/journal.pgen.1006717)
- 485 25. Choe, A., Reuss, von, S. H., Kogan, D., Gasser, R. B., Platzer, E. G., Schroeder, F. C.  
486 & Sternberg, P. W. 2012 Ascaroside Signaling Is Widely Conserved among  
487 Nematodes. *Current Biology* **22**, 772–780. (doi:10.1016/j.cub.2012.03.024)
- 488 26. Markov, G. V., Meyer, J. M., Panda, O., Artyukhin, A. B., Claaßen, M., Witte, H.,  
489 Schroeder, F. C. & Sommer, R. J. 2016 Functional Conservation and Divergence of  
490 *daf-22* Paralogs in *Pristionchus pacificus* Dauer Development. *Mol Biol Evol* **33**,  
491 2506–2514. (doi:10.1093/molbev/msw090)
- 492 27. Dong, C., Reilly, D. K., Bergame, C., Dolke, F., Srinivasan, J. & Reuss, von, S. H.  
493 2018 Comparative Ascaroside Profiling of *Caenorhabditis* Exometabolomes Reveals  
494 Species-Specific ( $\omega$ ) and ( $\omega - 2$ )-Hydroxylation Downstream of Peroxisomal  $\beta$ -  
495 Oxidation. *J. Org. Chem.* **83**, 7109–7120. (doi:10.1021/acs.joc.8b00094)
- 496 28. Diaz, S. A., Brunet, V., Lloyd-Jones, G. C., Spinner, W., Wharam, B. & Viney, M. 2014  
497 Diverse and potentially manipulative signalling with ascarosides in the model  
498 nematode *C. elegans*. *BMC Evol. Biol.* **14**, 46. (doi:10.1186/1471-2148-14-46)
- 499 29. Bose, N., Meyer, J. M., Yim, J. J., Mayer, M. G., Markov, G. V., Ogawa, A.,

Werner, et al. A vital dye method in nematodes reveals age is a critical parameter in density-dependent plasticity

- 500 Schroeder, F. C. & Sommer, R. J. 2014 Natural Variation in Dauer Pheromone  
501 Production and Sensing Supports Intraspecific Competition in Nematodes. *Current*  
502 *Biology* **24**, 1536–1541. (doi:10.1016/j.cub.2014.05.045)
- 503 30. Greene, J. S. et al. 2016 Balancing selection shapes density-dependent foraging  
504 behaviour. *Nature* **539**, 254–258. (doi:10.1038/nature19848)
- 505 31. Falcke, J. M. et al. 2018 Linking Genomic and Metabolomic Natural Variation  
506 Uncovers Nematode Pheromone Biosynthesis. *Cell Chem Biol* **25**, 787–796.e12.  
507 (doi:10.1016/j.chembiol.2018.04.004)
- 508 32. Bose, N., Ogawa, A., Reuss, von, S. H., Yim, J. J., Ragsdale, E. J., Sommer, R. J. &  
509 Schroeder, F. C. 2012 Complex Small-Molecule Architectures Regulate Phenotypic  
510 Plasticity in a Nematode. *Angewandte Chemie International Edition* **51**, 12438–12443.  
511 (doi:10.1002/anie.201206797)
- 512 33. Sommer, R. J. & McGaughan, A. 2013 The nematode *Pristionchus pacificus* as a  
513 model system for integrative studies in evolutionary biology. *Molecular Ecology* **22**,  
514 2380–2393. (doi:10.1111/mec.12286)
- 515 34. Herrmann, M., Mayer, W. E. & Sommer, R. J. 2006 Nematodes of the genus  
516 *Pristionchus* are closely associated with scarab beetles and the Colorado potato  
517 beetle in Western Europe. *Zoology* **109**, 96–108. (doi:10.1016/j.zool.2006.03.001)
- 518 35. Herrmann, M., Mayer, W. E., Hong, R. L., Kienle, S., Minasaki, R. & Sommer, R. J.  
519 2007 The Nematode *Pristionchus pacificus* (Nematoda: Diplogastridae) Is Associated  
520 with the Oriental Beetle *Exomala orientalis* (Coleoptera: Scarabaeidae) in Japan.  
521 *Zoological Society of Japan*. (doi:10.2108/zsj.24.883)
- 522 36. Bento, G., Ogawa, A. & Sommer, R. J. 2010 Co-option of the hormone-signalling  
523 module dafachronic acid–DAF-12 in nematode evolution. *Nature* **466**, 494–497.  
524 (doi:10.1038/nature09164)
- 525 37. Sommer, R. J., Dardiry, M., Lenuzzi, M., Namdeo, S., Renahan, T., Sieriebriennikov,  
526 B. & Werner, M. S. 2017 The genetics of phenotypic plasticity in nematode feeding  
527 structures. *Open Biology* **7**, 160332–118. (doi:10.1098/rsob.160332)
- 528 38. Sanghvi, G. V., Baskaran, P., Röseler, W., Sieriebriennikov, B., Rödelisperger, C. &  
529 Sommer, R. J. 2016 Life History Responses and Gene Expression Profiles of the  
530 Nematode *Pristionchus pacificus* Cultured on *Cryptococcus* Yeasts. *PLoS ONE* **11**,  
531 e0164881. (doi:10.1371/journal.pone.0164881)
- 532 39. Wilecki, M., Lightfoot, J. W., Susoy, V. & Sommer, R. J. 2015 Predatory feeding  
533 behaviour in *Pristionchus* nematodes is dependent on phenotypic plasticity and  
534 induced by serotonin. *J. Exp. Biol.* **218**, 1306–1313. (doi:10.1242/jeb.118620)
- 535 40. Sommer, R. J. & Mayer, M. G. 2015 Toward a synthesis of developmental biology  
536 with evolutionary theory and ecology. *Annu. Rev. Cell Dev. Biol.* **31**, 453–471.  
537 (doi:10.1146/annurev-cellbio-102314-112451)

Werner, et al. A vital dye method in nematodes reveals age is a critical parameter in density-dependent plasticity

- 538 41. Meyer, J. M., Baskaran, P., Quast, C., Susoy, V., Rödelberger, C., Glöckner, F. O. &  
539 Sommer, R. J. 2017 Succession and dynamics of *Pristionchus* nematodes and their  
540 microbiome during decomposition of *Oryctes borbonicus* on La Réunion Island.  
541 *Environmental Microbiology* **19**, 1476–1489. (doi:10.1111/1462-2920.13697)
- 542 42. Werner, M. S., Sieriebriennikov, B., Loschko, T., Namdeo, S., Lenuzzi, M., Dardiry,  
543 M., Renahan, T., Sharma, D. R. & Sommer, R. J. 2017 Environmental influence on  
544 *Pristionchus pacificus* mouth form through different culture methods. *Sci Rep* **7**, 7207.  
545 (doi:10.1038/s41598-017-07455-7)
- 546 43. Thomas, M. C. & Lana, P. D. C. 2008 Evaluation of vital stains for free-living marine  
547 nematodes. *Brazilian Journal of Oceanography* **56**, 249–251. (doi:10.1590/S1679-  
548 87592008000300009)
- 549 44. Golden, J. W. & Riddle, D. L. 1985 A gene affecting production of the *Caenorhabditis*  
550 *elegans* dauer-inducing pheromone. *Mol. Gen. Genet.* **198**, 534–536.
- 551 45. Baskaran, P., Rödelberger, C., Prabh, N., Seroby, V., Markov, G. V., Hirsekorn, A.  
552 & Dieterich, C. 2015 Ancient gene duplications have shaped developmental stage-  
553 specific expression in *Pristionchus pacificus*. *BMC Evol. Biol.* **15**, 185.  
554 (doi:10.1186/s12862-015-0466-2)
- 555 46. Charlesworth, B. 1972 Selection in populations with overlapping generations. III.  
556 Conditions for genetic equilibrium. *Theoretical Population Biology*
- 557 47. Bento, G., Ogawa, A. & Sommer, R. J. 2010 Co-option of the hormone-signalling  
558 module dafachronic acid–DAF-12 in nematode evolution. *Nature* **466**, 494–497.  
559 (doi:10.1038/nature09164)
- 560 48. Seroby, V., Ragsdale, E. J., Müller, M. R. & Sommer, R. J. 2013 Feeding plasticity  
561 in the nematode *Pristionchus pacificus* influenced by sex and social context and is  
562 linked to developmental speed. *Evolution & Development* **15**, 161–170.  
563 (doi:10.1111/ede.12030)
- 564 49. Seroby, V., Ragsdale, E. J. & Sommer, R. J. 2014 Adaptive value of a predatory  
565 mouth-form in a dimorphic nematode. *Proceedings of the Royal Society of London B:*  
566 *Biological Sciences* **281**, 20141334–989. (doi:10.1098/rspb.2014.1334)
- 567 50. Frézal, L. & Félix, M.-A. 2015 The Natural History of Model Organisms: *C. elegans*  
568 outside the Petri dish. *Elife* **4**, e05849. (doi:10.7554/eLife.05849)
- 569 51. Trewavas, A. 2002 Malthus foiled again and again. *Nature* **418**, 668–670.  
570 (doi:10.1038/nature01013)
- 571 52. Malthus, T. R., Winch, D. & James, P. 1992 *Malthus: 'An Essay on the Principle of*  
572 *Population'*. Cambridge University Press.
- 573 53. Griffin, C. T. 2012 Perspectives on the behavior of entomopathogenic nematodes  
574 from dispersal to reproduction: traits contributing to nematode fitness and biocontrol  
575 efficacy. *J. Nematol.* **44**, 177–184.



Werner, et al. A vital dye method in nematodes reveals age is a critical parameter in density-dependent plasticity

- 576 54. Zenner, A. N. R. L., O'Callaghan, K. M. & Griffin, C. T. 2014 Lethal Fighting in  
577 Nematodes Is Dependent on Developmental Pathway: Male-Male Fighting in the  
578 Entomopathogenic Nematode *Steinernema longicaudum*. *PLoS ONE* **9**, e89385.  
579 (doi:10.1371/journal.pone.0089385)
- 580 55. O'Callaghan, K. M., Zenner, A. N. R. L., Hartley, C. J. & Griffin, C. T. 2014  
581 Interference competition in entomopathogenic nematodes: male *Steinernema* kill  
582 members of their own and other species. *International Journal for Parasitology* **44**,  
583 1009–1017. (doi:10.1016/j.ijpara.2014.07.004)
- 584 56. Campos-Herrera, R. 2015 *Nematode Pathogenesis of Insects and Other Pests*.  
585 Cham: Springer.
- 586 57. Renahan, T. & Hong, R. L. 2017 A species-specific nematocide that results in terminal  
587 embryogenesis. *J. Exp. Biol.* **220**, jeb.159665–3247. (doi:10.1242/jeb.159665)
- 588 58. Cinkornpumin, J. K., Wisidagama, D. R., Rapoport, V., elife, J. G. 2014 A host beetle  
589 pheromone regulates development and behavior in the nematode *Pristionchus*  
590 *pacificus*. *Elife*.
- 591
- 592 59. Evans, K. S., Zhao, Y., Brady, S. C., Long, L., McGrath, P. T. & Andersen, E. C. 2016  
593 Correlations of Genotype with Climate Parameters Suggest *Caenorhabditis elegans*  
594 Niche Adaptations. *G3: Genes, Genomes, Genetics* **7**, g3.116.035162–298.  
595 (doi:10.1534/g3.116.035162)
- 596 60. Félix, M.-A., Jovelín, R., Ferrari, C., Han, S., Cho, Y. R., Andersen, E. C., Cutter, A. D.  
597 & Braendle, C. 2013 Species richness, distribution and genetic diversity of  
598 *Caenorhabditis* nematodes in a remote tropical rainforest. *BMC Evol. Biol.* **13**, 10.  
599 (doi:10.1186/1471-2148-13-10)
- 600 61. Cook, D. E., Zdraljevic, S., Roberts, J. P. & Andersen, E. C. 2017 CeNDR, the  
601 *Caenorhabditis elegans* natural diversity resource. *Nucleic Acids Res.* **45**, D650–  
602 D657. (doi:10.1093/nar/gkw893)
- 603 62. Petersen, C., Dirksen, P., Prahl, S., Strathmann, E. A. & Schulenburg, H. 2014 The  
604 prevalence of *Caenorhabditis elegans* across 1.5 years in selected North German  
605 locations: the importance of substrate type, abiotic parameters, and *Caenorhabditis*  
606 competitors. *BMC Ecol.* **14**, 4. (doi:10.1186/1472-6785-14-4)
- 607 63. Poulet, N. & Braendle, C. 2015 Sampling and Isolation of *C. elegans* from the Natural  
608 Habitat. *Methods Mol. Biol.* **1327**, 221–229. (doi:10.1007/978-1-4939-2842-2\_16)
- 609 64. Bourke, A. F. G. 2014 Hamilton's rule and the causes of social evolution.  
610 *Philosophical Transactions of the Royal Society of London B: Biological Sciences* **369**,  
611 20130362–20130362. (doi:10.1098/rstb.2013.0362)
- 612 65. Charlesworth, B. 1994 *Evolution in age-structured populations*.

Werner, et al. A vital dye method in nematodes reveals age is a critical parameter in density-dependent plasticity

---

613

614

615 **Figure Legends**

616

617 **Figure 1. Life cycle and developmental plasticity of the model nematode *Pristionchus***  
 618 ***pacificus*.**

619 (a) The life cycle of *P. pacificus* consists of four juvenile stages (J1-4) until sexual maturation  
 620 (adults). Like many nematodes *P. pacificus* can enter a long-living 'dormant' dauer state that is  
 621 resistant to harsh environmental conditions. The decision to continue through the direct life  
 622 cycle or enter dauer is regulated by small molecule excreted ascarosides (chemical structure  
 623 adapted from [13]). (b) *P. pacificus* can also adopt one of two possible feeding structures; either  
 624 a microbivorous narrow-mouth (stenostomatous, St), or (c) an omnivorous wide-mouth  
 625 (eurystomatous, Eu) with an extra tooth that can be utilized to kill and eat other nematodes or  
 626 fungi. White lines indicate the presence of an extra tooth (right side) in the Eu morph or its  
 627 absence in the St morph, and the dorsal tooth (left side), which is flint-like in St and hook-like in  
 628 Eu. White scale bar indicates 5  $\mu$ M. (d), *P. pacificus* is often found in a necromenic association  
 629 with beetles (ex. shown here *Oryctes borbonicus*) in the dauer state, and resumes the free living  
 630 life cycle upon beetle death to feed on the ensuing microbial bloom.

631

632 **Figure 2. Vital-dye method confirms adult-specific density effect on mouth form.**

633 (a-e) *P. pacificus* were stained with either 0.005% Neutral Red or 50  $\mu$ M CellTracker Green  
 634 Bodipy (Thermo) and viewed using Cy3 and FITC filters. Images were merged with Differential  
 635 interference contrast (DIC), scale bar = 100  $\mu$ M. An example of relative intensities of each



Werner, et al. A vital dye method in nematodes reveals age is a critical parameter in density-dependent plasticity

fluorescence channel are displayed in the histograms (right) with the chemical structure of Neutral Red or CellTracker Green Bodipy. (f) Age-dependent functional pheromone assay: Experimental juveniles were stained with Neutral Red, and challenged with CellTracker Green Bodipy-stained juveniles or adults on standard condition NGM agar plates seeded with 300  $\mu$ l OP50 *E. coli*. Three days later, only red-positive and green-negative adults were phenotyped. (g) The wild isolate RSC017 grown in standard conditions (5 young adults passed to fresh plates, progeny phenotyped 4 days later) are highly stenostomatous (<10%,  $n=102$ ). (h,i) Mouth form ratios of Neutral Red-stained J2s, and (j,k) dauers, with increasing number of CellTracker Green-stained competitors, as described in (f) ( $n=3-5$  independent biological replicates per experiment, with total  $n=104$ , 126, 134, and 109 for 200 NR-stained J2 with 0, 50, 200, and 500 CellTracker Green-stained J2s, and 115, 113, and 112 for 50, 200, and 500 CellTracker Green-stained adults;  $n=104$ , 105, 105, and 102 for NR-stained dauers with 0, 50, 200, and 500 CellTracker Green-stained dauers, and 100, 103, and 105 for 50, 200, and 500 CellTracker Green-stained adults. Overall significance between strain and age was determined by a binomial linear regression (see Materials and methods), and pair-wise comparisons were assessed by Fisher's exact test on summed Eu counts (Significance codes: '\*\*\*' < 0.001, '\*\*' < 0.01, '\*' < 0.05). Mouth forms were phenotyped at 40-100x on a Zeiss Axio Imager 2 light microscope. (i) Percent reaching adulthood (top) and percent Eu of those that reached adulthood (bottom) after increasing numbers of J2s are added to standard 6 cm NGM agar plates with 300  $\mu$ l OP50 *E.coli* bacteria ( $n=2$  biological replicates, with total  $n$  for percent reaching adulthood=216, 202, 206, 207, and 202 for 1, 3, 4, 5, and 10 thousand J2s, and total  $n$  for mouth form=106, 106, 103, 110, and 104). Significance was determined by a binomial regression (see Materials and methods).

**Figure 3. Adult-specific secretions induce predatory morph in juveniles.**

Highly St strain RSC017 juveniles were exposed to J2 and adult supernatants of its own strain, and to the J2 and adult supernatants of highly Eu strain RS2333. Mouth form was phenotyped three days later. Worms exposed to J2 secretions remained highly St, while worms exposed to adult secretions had a small but significant increase in Eu morphs ( $p < 0.05$ , Fisher's exact test). Supernatants from the double mutant *daf-22.1/2*, which has deficient ascaroside pheromone production, did not elicit juvenile or adult increase in Eu. Worms exposed to the S-media control also remained highly St.  $n=4$  independent biological replicates for RS2333 and *daf-22.1/2* secretions, and  $n=2$  independent biological replicates for RSC017 adult and juvenile secretions, with an average count of 55 animals per replicate. For display, total Eu and St counts are presented as percentages (Significance codes: '\*\*\*'  $< 0.001$ , '\*\*'  $< 0.01$ , '\*'  $< 0.05$ ).

**Figure 4. Time-resolved Nematode-Derived Modular Metabolites (NDMMs) in *Pristionchus pacificus*.**

(a) Time resolved secretion profile of nematode derived modular metabolites from the wild-type laboratory strain RS2333 and (b) wild isolate RSC017. Data is presented as the mean of 8 (RS2333) and 9 (RSC017) biological replicates, and error bars represent standard error of the mean (SEM). (c-e) Chemical structures of adult specific NDMMs dasc#1, npar#1, and ascr#9, as described in the Small Molecule Identifier Database (<http://www.smid-db.org/>), produced in ChemDraw. (f-k) Time-resolved abundance of dasc#1, npar#1, and ascr#9 NDMMs in RS2333 and RSC017. Each data point represents a biological replicate, and for comparison to (a-b) lines represent mean abundance.  $P$  values calculated by a 2-tailed students  $t$ -test (Significance codes: '\*\*\*'  $< 0.001$ , '\*\*'  $< 0.01$ , '\*'  $< 0.05$ ).

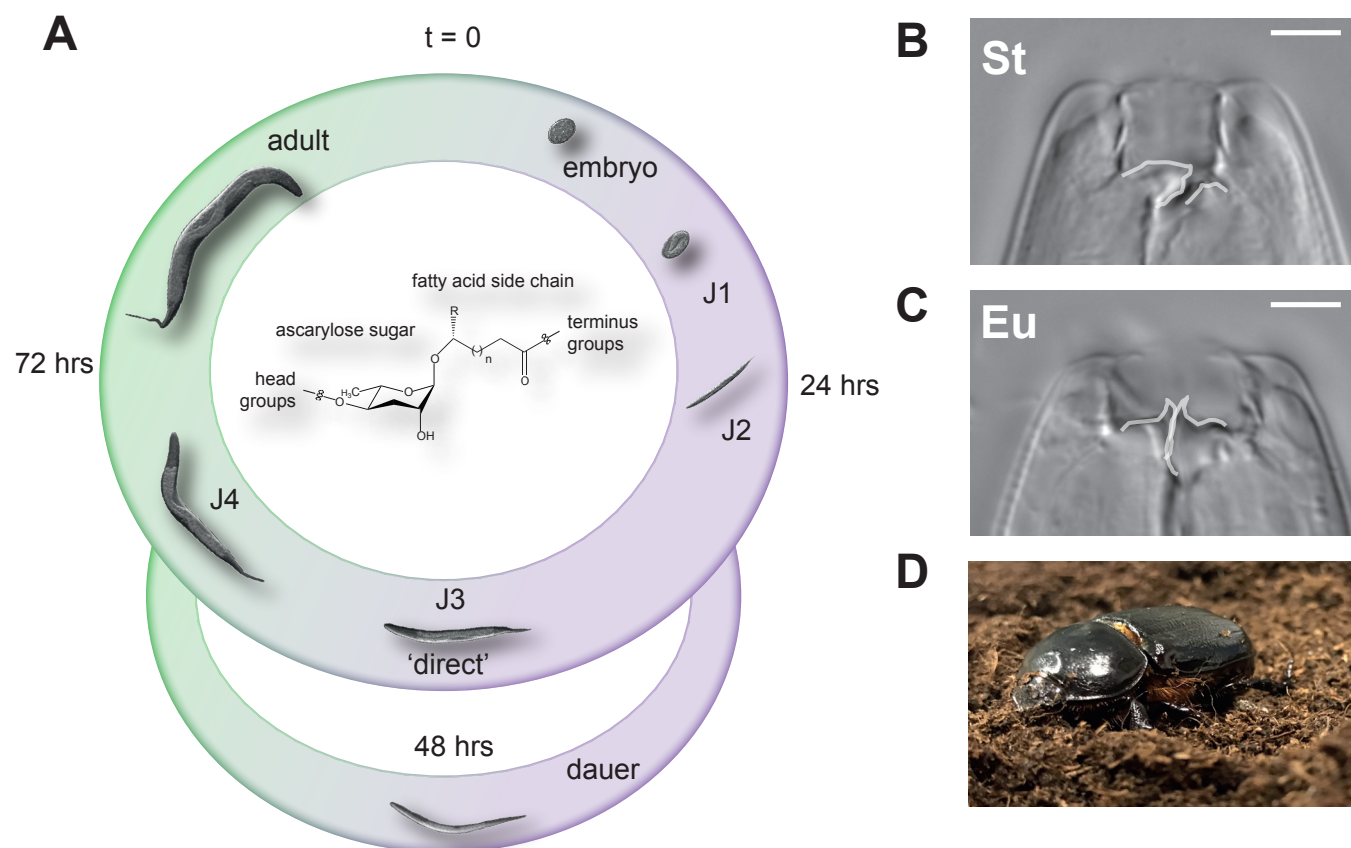

**Figure 1. Life cycle and developmental plasticity of the model nematode *Pristionchus pacificus*.**

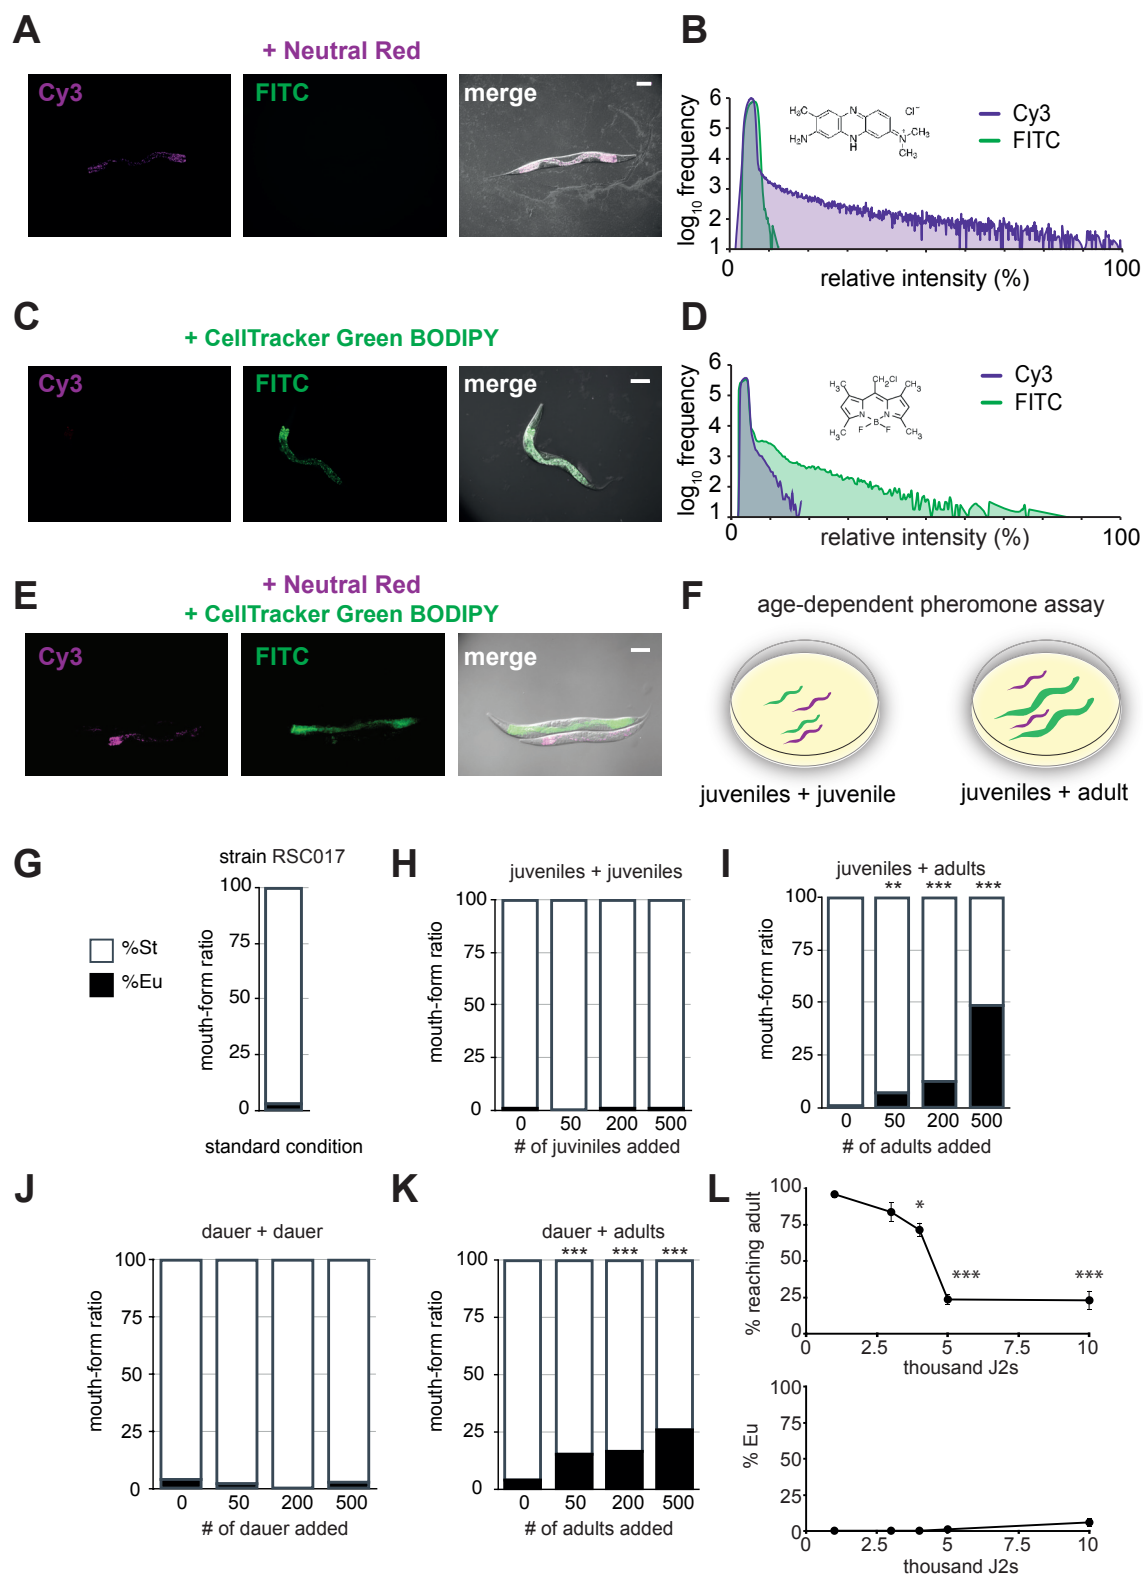

**Figure 2. Vital-dye method confirms adult-specific density effect on mouth form.**

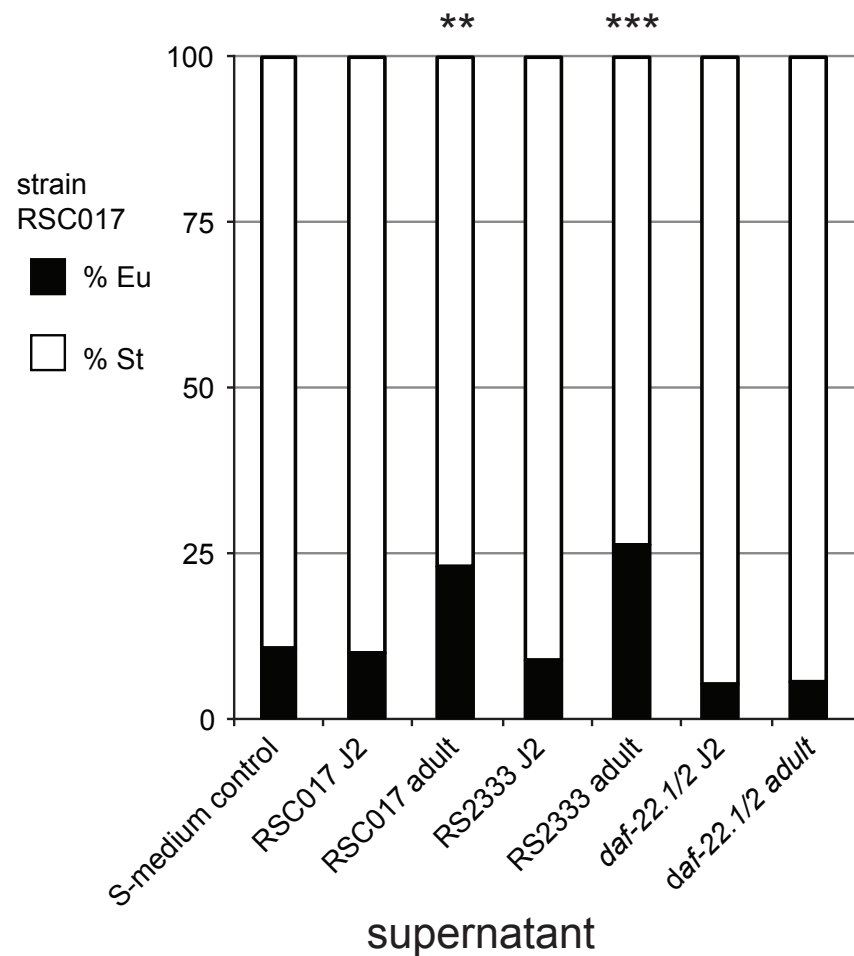

**Figure 3. Adult-specific secretions induce predatory morph in juveniles.**

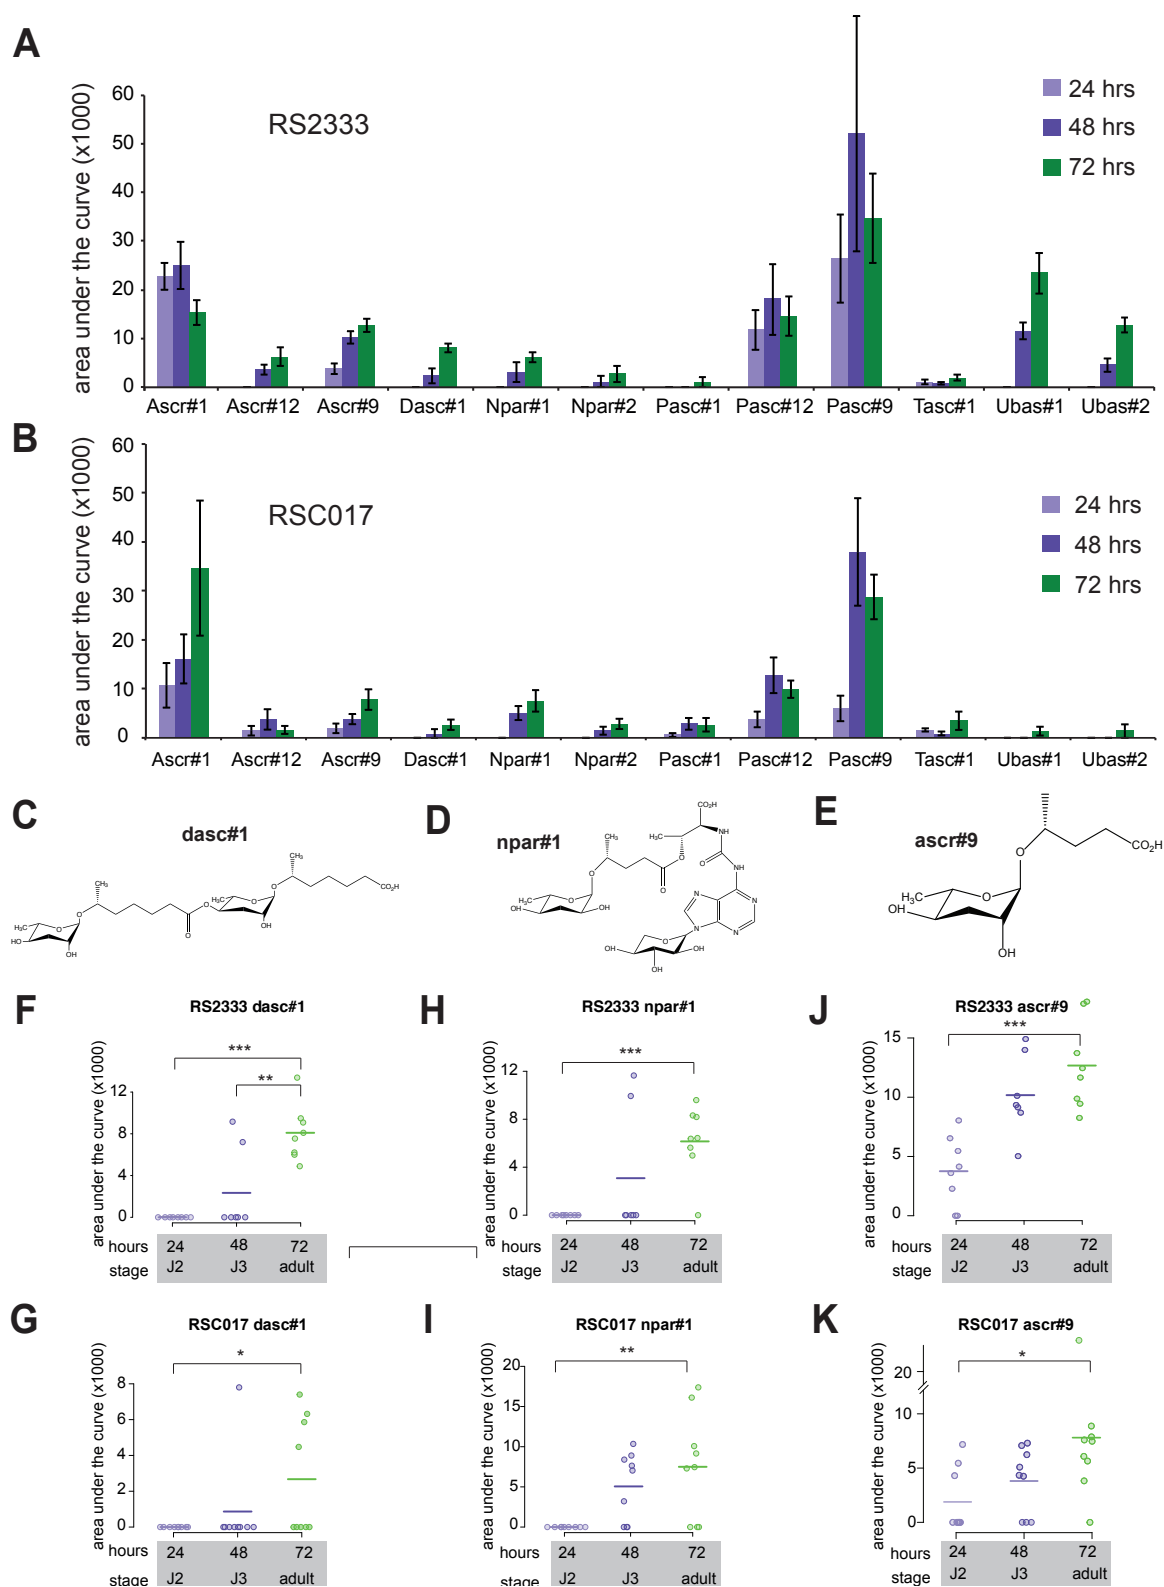

**Figure 4. Time-resolved Nematode-Derived Modular Metabolites (NDMMs) in *Pristionchus pacificus*.**
